# Supplementary material
Source: HighWire-hosted journal article supplement (https://bmjopen.bmj.com/content/11/6/e047859)
Supplement: inline-supplementary-material-1 [file inline-supplementary-material-1.pdf]

## Variables in EUROLINKCAT Common Data Model: Mortality

| <b>Variable Name</b>                                                                                                  | <b>Variable Definition and Instructions</b>                                    | <b>Variable Format</b> | <b>Variable Values</b>                                                                                                                                                                                                                                       |
|-----------------------------------------------------------------------------------------------------------------------|--------------------------------------------------------------------------------|------------------------|--------------------------------------------------------------------------------------------------------------------------------------------------------------------------------------------------------------------------------------------------------------|
| <b>Core variable required for linkage to vital statistics or mortality databases and for calculating age at death</b> |                                                                                |                        |                                                                                                                                                                                                                                                              |
| L_CH_ID                                                                                                               | Unique identifier of child<br>A unique ID that links child to another database | As recorded locally    |                                                                                                                                                                                                                                                              |
| L_CH_DATE_B                                                                                                           | Child's date of birth<br>Needed to calculate age at death.                     | DDMonYYYY              |                                                                                                                                                                                                                                                              |
| L_CH_DATE_D                                                                                                           | Child's date of death<br>Needed to calculate age at death.                     | DDMonYYYY              |                                                                                                                                                                                                                                                              |
| <b>Variables relating to linkage</b>                                                                                  |                                                                                |                        |                                                                                                                                                                                                                                                              |
| L_MATCH_TYPE                                                                                                          | Match with vital statistics database (or local health care databases)          | Numeric                | 1 = Linked to national/vital statistics database – match<br>2 = Linked to national/vital statistics database – non-match<br>3 = Linked to mortality database only – match<br>4 = Linked to mortality database only – non-match<br>5 = EUROLINKCAT death only |

| <b>Variable Name</b>                            | <b>Variable Definition and Instructions</b>                                                                                                                                                                                                          | <b>Variable Format</b> | <b>Variable Values</b>                                                                                              |
|-------------------------------------------------|------------------------------------------------------------------------------------------------------------------------------------------------------------------------------------------------------------------------------------------------------|------------------------|---------------------------------------------------------------------------------------------------------------------|
| L_CONFIDENCE                                    | Strength of match with vital statistics or health care database.<br><br>Use local data provider's codes for assessing confidence that the case is correctly matched. If local code unavailable, use suggested coding (see Appendix for full details) | Numeric                | 1=Excellent<br>2=Good<br>3=Fair<br>4=Poor<br>9=Not Matched                                                          |
| L_DATE_LOST                                     | Date lost to follow-up/ linkage (i.e. due to emigration, adoption or other reason)                                                                                                                                                                   | DDMonYYYY              | .=Not recorded by registry or not available for study                                                               |
| L_YEAR_LOST                                     | Year lost to follow-up/ linkage (i.e. due to emigration, adoption or other reason)                                                                                                                                                                   | YYYY                   | .=Not recorded by registry or not available for study                                                               |
| L_AGE_L_D                                       | Age lost to follow-up/ linkage <u>in complete days</u>                                                                                                                                                                                               | Numeric (1-4 digits)   | .=Not recorded by registry or not available for study                                                               |
| <b>Standardised variables relating to child</b> |                                                                                                                                                                                                                                                      |                        |                                                                                                                     |
| L_CH_YEAR_B                                     | Child's year of birth                                                                                                                                                                                                                                | YYYY                   |                                                                                                                     |
| L_CH_SEX                                        | Child's sex                                                                                                                                                                                                                                          | Numeric                | 1 = Male<br>2 = Female<br>3=Indeterminate<br>9 = Not known<br>.=Not recorded by registry or not available for study |
| L_CH_REG_TYPE                                   | Type of birth/ civil registration of baby                                                                                                                                                                                                            | Numeric                | 1 = Livebirth<br>2 = Stillbirth<br>9 = Not known<br>.=Not recorded by registry or not available for study           |
| L_CH_NON_EUR                                    | Citizenship/ Nationality of infant /country of origin                                                                                                                                                                                                | Numeric                | 1= National<br>2= Other European<br>3 = Non-European                                                                |

| <b>Variable Name</b>                   | <b>Variable Definition and Instructions</b>                                                                                                                                                                                                                                                                                                                                                                                                                                                                                                                                                                                                                                 | <b>Variable Format</b> | <b>Variable Values</b>                                                                                                                    |
|----------------------------------------|-----------------------------------------------------------------------------------------------------------------------------------------------------------------------------------------------------------------------------------------------------------------------------------------------------------------------------------------------------------------------------------------------------------------------------------------------------------------------------------------------------------------------------------------------------------------------------------------------------------------------------------------------------------------------------|------------------------|-------------------------------------------------------------------------------------------------------------------------------------------|
|                                        |                                                                                                                                                                                                                                                                                                                                                                                                                                                                                                                                                                                                                                                                             |                        | 4= Non-national (exact nationality not specified)<br>9 = Not known<br>. = Not recorded by registry or not available for study             |
| L_CH_BW                                | Child's birthweight (grams)                                                                                                                                                                                                                                                                                                                                                                                                                                                                                                                                                                                                                                                 | Numeric                | 9999=Not known<br>.=Not recorded by registry or not available for study                                                                   |
| L_CH_GA_B                              | Child's gestational age at birth (completed weeks)                                                                                                                                                                                                                                                                                                                                                                                                                                                                                                                                                                                                                          | Numeric                | 99=Not known<br>.=Not recorded by registry or not available for study                                                                     |
| <b>Variables relating to mortality</b> |                                                                                                                                                                                                                                                                                                                                                                                                                                                                                                                                                                                                                                                                             |                        |                                                                                                                                           |
| L_CH_STATUS                            | <p>Outcome status</p> <p>-Died = child is known to have died before 10th birthday or 31 Dec 2015 (whichever earlier)</p> <p>-Alive at 10th birthday = child was born on or before the 31st Dec 2005 and:</p> <p>(i) is definitively known to be alive on 10th birthday; or (ii) there is no information on death or lost to follow-up</p> <p>- Censored on 31st Dec 2015 = child was born on or after 1st Jan 2006 and:</p> <p>(i) is definitively known to be alive on 31st Dec 2015; or (ii) there is no information on death or lost to follow-up</p> <p>-Lost to follow up = child is lost to follow-up/ linkage (i.e. due to emigration, adoption or other reason)</p> | Numeric                | <p>1 = Died</p> <p>2 = Alive at 10<sup>th</sup> birthday</p> <p>3 = Censored on 31<sup>st</sup> Dec 2015</p> <p>4 = Lost to follow up</p> |

| <b>Variable Name</b> | <b>Variable Definition and Instructions</b>                                                                                                                                                                                                                                                                                                                                                                                                                                                                                                                                                                                                                                                                                                                                                                                            | <b>Variable Format</b>             | <b>Variable Values</b>                                                                                                                                                                                                                                                                  |
|----------------------|----------------------------------------------------------------------------------------------------------------------------------------------------------------------------------------------------------------------------------------------------------------------------------------------------------------------------------------------------------------------------------------------------------------------------------------------------------------------------------------------------------------------------------------------------------------------------------------------------------------------------------------------------------------------------------------------------------------------------------------------------------------------------------------------------------------------------------------|------------------------------------|-----------------------------------------------------------------------------------------------------------------------------------------------------------------------------------------------------------------------------------------------------------------------------------------|
| L_EXIT_DATE          | <p>Date of last day in study (censored/lost/died/alive)</p> <ul style="list-style-type: none"> <li>- Date lost - if child was lost to follow up</li> <li>- Date of death - if child has died</li> <li>- Date of birth plus 3652 days (approx. 10th birthday) if child was born on or before the 31st Dec 2005 and:               <ul style="list-style-type: none"> <li>(i) is definitively known to be alive on 10th birthday;</li> <li>or (ii) there is no information on death or lost to follow-up</li> </ul> </li> <li>- Date of last day of the study (31st Dec 2015) if child was born on or after 1st Jan 2006 and:               <ul style="list-style-type: none"> <li>(i) is definitively known to be alive on 31st Dec 2015;</li> <li>or (ii) there is no information on death or lost to follow-up</li> </ul> </li> </ul> | DDMonYYYY                          |                                                                                                                                                                                                                                                                                         |
| L_EXIT_DAYS          | <p>Number of days child is in study</p> <p>This is calculated as the last date child was in the study (L_EXIT_DATE) minus the child's birth date (L_CH_DATE_B).</p>                                                                                                                                                                                                                                                                                                                                                                                                                                                                                                                                                                                                                                                                    | Numeric (1-4 digits)               |                                                                                                                                                                                                                                                                                         |
| L_CH_YEAR_D          | Year of child's death as recorded on the death certificate                                                                                                                                                                                                                                                                                                                                                                                                                                                                                                                                                                                                                                                                                                                                                                             | YYYY                               |                                                                                                                                                                                                                                                                                         |
| L_CH_AGED_H          | <p>Age at death in complete hours for day 0 (first 24 hours) = applies to infants who died within the first 24 hours</p> <p>This variable can be used to check values recorded under variable L_CH_AGED_D.</p> <p>A child who died within 24 hours but across two dates is coded "0" on L_CH_AGED_D below.</p>                                                                                                                                                                                                                                                                                                                                                                                                                                                                                                                         | <p>Numeric</p> <p>(1-2 digits)</p> | <p>0 = Died &lt;1 hour after birth</p> <p>1 = Died 1 complete hour after birth</p> <p>2 = Died 2 complete hours after birth</p> <p>Etc.</p> <p>23 = Died 23 complete hours after birth</p> <p>88 = Alive at 24 hours</p> <p>99 = Died within first 24 hours, but exact time unknown</p> |

| <b>Variable Name</b> | <b>Variable Definition and Instructions</b>                                                                                                                                                                                     | <b>Variable Format</b> | <b>Variable Values</b>                                                                                                                                                                                                                                            |
|----------------------|---------------------------------------------------------------------------------------------------------------------------------------------------------------------------------------------------------------------------------|------------------------|-------------------------------------------------------------------------------------------------------------------------------------------------------------------------------------------------------------------------------------------------------------------|
| L_CH_AGED_D          | Age at death <u>in complete days</u> (up to 10 <sup>th</sup> birthday).<br><br>A calculated field using the difference between date of death and death of birth i.e. subtract child's date of birth from child's date of death. | Numeric (1-4 digits)   | 0 = died <24 hours after birth<br>1 = died 1 complete day after birth<br>2 = died 2 complete days after birth<br>Etc.<br>8888 = Alive on 10th birthday or by end of study period, whichever is sooner<br>9999 = Died before 10th birthday, but exact time unknown |
| L_CAUSE_D_U          | Underlying cause of death - diagnosis<br><br>There can only be one underlying cause of death                                                                                                                                    | String                 | ICD9 or ICD10 code                                                                                                                                                                                                                                                |
| L_CAUSE_D_P          | Primary/ immediate cause of death - diagnosis                                                                                                                                                                                   | String                 | ICD9 or ICD10 code                                                                                                                                                                                                                                                |
| L_CAUSE_D_C          | Contributing cause of death - diagnosis                                                                                                                                                                                         | String                 | ICD9 or ICD10 code                                                                                                                                                                                                                                                |
| L_CAUSE_D_O1         | Other causes of death- diagnosis 1                                                                                                                                                                                              | String                 | ICD9 or ICD10 code                                                                                                                                                                                                                                                |
| L_CAUSE_D_O2         | Other causes of death- diagnosis 2                                                                                                                                                                                              | String                 | ICD9 or ICD10 code                                                                                                                                                                                                                                                |
| L_CAUSE_D_O3         | Other causes of death- diagnosis 3                                                                                                                                                                                              | String                 | ICD9 or ICD10 code                                                                                                                                                                                                                                                |
| L_CAUSE_D_O4         | Other causes of death- diagnosis 4                                                                                                                                                                                              | String                 | ICD9 or ICD10 code                                                                                                                                                                                                                                                |
| L_CAUSE_D_O5         | Other causes of death- diagnosis 5<br><br>Additional "Other causes of death" can be recorded in variables L_CAUSE_D_O6 to L_CAUSE_D_15 (not listed)                                                                             | String                 | ICD9 or ICD10 code                                                                                                                                                                                                                                                |
| L_CH_PLACE_D         | Place of death                                                                                                                                                                                                                  | Numeric                | 1 = Home<br>2 = Hospital<br>3 = Other<br>9 = Not known<br>.=Not recorded by registry or not available for study                                                                                                                                                   |

| <b>Variable Name</b>                | <b>Variable Definition and Instructions</b>                                                                                                      | <b>Variable Format</b>             | <b>Variable Values</b>                                                                                                                                                                  |
|-------------------------------------|--------------------------------------------------------------------------------------------------------------------------------------------------|------------------------------------|-----------------------------------------------------------------------------------------------------------------------------------------------------------------------------------------|
| <b>Variables relating to mother</b> |                                                                                                                                                  |                                    |                                                                                                                                                                                         |
| L_MAT_YEAR_B                        | Maternal year of birth                                                                                                                           | YYYY                               | 99 = Not known<br>.<br>= Not recorded by registry or not available for study                                                                                                            |
| L_MATAGE_B                          | Maternal age at infant's birth <u>in completed years</u><br><br>May be used to link information held on the child in local health care databases | Numeric                            | 99=Not known<br>.<br>=Not recorded by registry or not available for study                                                                                                               |
| L_MULT_BIRTH                        | Singleton or multiple birth                                                                                                                      | Numeric                            | 1=Singleton<br>2=Twins<br>3=Triplets or higher<br>4= Multiple birth, number unknown<br>9= Not known<br>.<br>=Not recorded by registry or not available for study                        |
| L_MAT_CTRY_B                        | Maternal country of birth/ place of birth/ country of origin                                                                                     | Numeric                            | 1= National<br>2= Other European<br>3 = Non-European<br>4= Non-national (exact nationality not specified)<br>9 = Not known<br>.<br>=Not recorded by registry or not available for study |
| L_MAT_BMI                           | Maternal Body Mass Index (BMI) at first antenatal visit/at booking<br><br>Expected range 15 – 50                                                 | Numeric<br><br>(Whole number only) | Exact BMI value<br>97 = <30<br>98 = >=30<br>99 = Not known<br>.<br>=Not recorded by registry or not available for study                                                                 |
| L_MAT_EDUC                          | Maternal education                                                                                                                               | Numeric                            | 1 = Pre-primary /Primary<br>2 = Any secondary<br>3 = Postsecondary (non-tertiary)                                                                                                       |

| <b>Variable Name</b> | <b>Variable Definition and Instructions</b>                                                                                                                                                                                                              | <b>Variable Format</b> | <b>Variable Values</b>                                                                                                                                                                                                                                                                                                                                                                                |
|----------------------|----------------------------------------------------------------------------------------------------------------------------------------------------------------------------------------------------------------------------------------------------------|------------------------|-------------------------------------------------------------------------------------------------------------------------------------------------------------------------------------------------------------------------------------------------------------------------------------------------------------------------------------------------------------------------------------------------------|
|                      | (UNESCO's International Standard Classification of Education (ISCED))                                                                                                                                                                                    |                        | 4 = Tertiary<br>5=No education<br>9 = Not known<br>. = Not recorded by registry or not available for study                                                                                                                                                                                                                                                                                            |
| L_MAT_OCC            | Maternal occupation<br><br>(Based on Paris (INSERM) coding classification)                                                                                                                                                                               | Numeric                | 1= Farmer<br>2= Artisan (ex: baker) / shop-owner<br>3= Professional<br>4= Intermediate<br>5= Administrative/public service<br>6= Business employees: shop assistants/ salesperson<br>7= Household and personal service<br>8= Skilled manual worker<br>9=Unskilled manual worker<br><br>0= No occupation declared / student<br>99= Not known<br>. =Not recorded by registry or not available for study |
| L_MATDEPR_IND        | Deprivation index at maternal residence<br><br>Multiple deprivations scores are ranked into quintiles where 1= Least deprived and 5 = Most deprived (coding scheme used in Wales & Basque Country)                                                       | Numeric                | 1 = First quintile (Least deprived)<br>2 = Second quintile<br>3 = Third quintile<br>4 = Fourth quintile<br>5 = Fifth quintile (Most deprived)<br>9 = Not known<br>. =Not recorded by registry or not available for study                                                                                                                                                                              |
| L_PROXY_SES          | Proxy variable for SES<br><br>This is registry-specific. Use the agreed proxy variable for each registry.<br><br>Maternal education: <ul style="list-style-type: none"> <li>• Tertiary/ post-secondary=High</li> <li>• Any secondary = Middle</li> </ul> | Numeric                | 1 = High<br>2 = Middle<br>3 = Low<br>9=Not known<br>. = Not recorded by registry or not available for study                                                                                                                                                                                                                                                                                           |

| <b>Variable Name</b>     | <b>Variable Definition and Instructions</b>                                                                                                                                                                                                                                                                                                                                                                                            | <b>Variable Format</b> | <b>Variable Values</b>                                                                                                                                        |
|--------------------------|----------------------------------------------------------------------------------------------------------------------------------------------------------------------------------------------------------------------------------------------------------------------------------------------------------------------------------------------------------------------------------------------------------------------------------------|------------------------|---------------------------------------------------------------------------------------------------------------------------------------------------------------|
|                          | <ul style="list-style-type: none"> <li>Primary/ pre-primary/ No education = Low</li> </ul> Maternal occupation: <ul style="list-style-type: none"> <li>Professional = High</li> <li>Intermediate= Middle</li> <li>No occupation = Low</li> </ul> Multiple Deprivation Index <ul style="list-style-type: none"> <li>Quintile 1 (Least deprived)=High</li> <li>Quintiles 2-4= Middle</li> <li>Quintile 5 (Most deprived)= Low</li> </ul> |                        |                                                                                                                                                               |
| L_MATMAR_STA             | Maternal marital status                                                                                                                                                                                                                                                                                                                                                                                                                | Numeric                | 1 = Single<br>2 = Married/ Living together<br>3 = Widow<br>4 = Divorced/ Separated<br>9 = Not known<br>. =Not recorded by registry or not available for study |
| <b>Recoded variables</b> |                                                                                                                                                                                                                                                                                                                                                                                                                                        |                        |                                                                                                                                                               |
| Yeargp                   | Grouped year of birth<br>1995/2004=1<br>2005/2014 =2                                                                                                                                                                                                                                                                                                                                                                                   | Numeric                | 1 = 1995-2004<br>2 = 2005-2014                                                                                                                                |
| BMI_gp                   | Grouped BMI<br><br>BMI <10, code as unknown<br>BMI >60, code as unknown<br>Blank or missing, code as unknown                                                                                                                                                                                                                                                                                                                           | Numeric                | 1 = <30<br>2 = 30+<br>9 = unknown                                                                                                                             |
| BW_gp                    | Grouped Birthweight<br><br>BW <400g, code as unknown<br>BW >7000g, code as unknown<br>Blank or missing, code as unknown                                                                                                                                                                                                                                                                                                                | Numeric                | 1= <1000g<br>2 = 1000-1499g<br>3 = 1500-2499g<br>4 = 2500-3999g<br>5 = 4000+ g<br>9 = unknown                                                                 |
| GA_gp                    | Grouped Gestational age                                                                                                                                                                                                                                                                                                                                                                                                                | Numeric                | 1 = 24-27weeks<br>2 = 28-31 weeks                                                                                                                             |



| <b>Variable Name</b> | <b>Variable Definition and Instructions</b>                                                                                                                                           | <b>Variable Format</b> | <b>Variable Values</b>                                          |
|----------------------|---------------------------------------------------------------------------------------------------------------------------------------------------------------------------------------|------------------------|-----------------------------------------------------------------|
|                      | GA <24 weeks, excluded from study<br>GA >45 weeks, code as unknown<br>Blank or missing, code as unknown                                                                               |                        | 3= 32-36 weeks<br>4 = 37+ weeks<br>9 = unknown                  |
| GA_disc_gp           | Grouped Gestational age at discovery<br><br>GA at discovery <8 weeks, code as unknown<br>GA at discovery >42 weeks, code as unknown<br>Blank or missing, code as unknown              | Numeric                | 1= <22 weeks<br>2 = 22-31 weeks<br>3 = 32+ weeks<br>9 = unknown |
| matage_gp            | Grouped Maternal age at infant's birth<br><br>Maternal age range<br>10-19 years, code =1<br>20-34 years, code=2<br>35-59 years, code=3<br>All other values, blanks or missing, code=9 | Numeric                | 1= <20 years<br>2= 20-34 years<br>3= 35+ years<br>9=Not known   |
